# Supplementary material for: Pretransplant Levels of CRP and Interleukin-6 Family Cytokines; Effects on Outcome after Allogeneic Stem Cell Transplantation
Source: PubMed Central journal article supplement (PMC5133824; doi:10.3390/ijms17111823), 2016-11-01
Supplement: ijms-17-01823-s001.pdf [file ijms-17-01823-s001.pdf]

## Supplementary Materials: Pretransplant Levels of CRP, Interleukin-6 Family Cytokines and Outcome after Allogeneic Stem Cell Transplantation

Tor Henrik Tvedt, Stein Atle Lie, Håkon Reikvam, Kristin Paulsen Rye, Roald Lindås, Tobias Gedde-Dahl, Aymen Bushra Ahmed and Øystein Bruserud

**Table S1.** Correlation between the preconditioning serum levels of IL-6 cytokine family members, IL-6R and sgp130. Spearman's rank order correlation test was used for the analyses. The results are presented as the Spearman's  $\rho$  and significant correlations ( $p < 0.05$ ) are highlighted in bold.

| Parameter | IL-6R       | sgp130      | IL-31        | OSM   | CNTF        |
|-----------|-------------|-------------|--------------|-------|-------------|
| IL-6      | <b>0.34</b> | <b>0.31</b> | 0.17         | 0.028 | -0.17       |
| IL-6R     |             | <b>0.71</b> | <b>-0.23</b> | 0.03  | 0.18        |
| sgp130    |             |             | <b>-0.26</b> | 0.11  | <b>0.24</b> |
| IL-31     |             |             |              | -0.06 | -0.17       |
| OSM       |             |             |              |       | <b>0.16</b> |

**Table S2.** Biological and clinical parameters of allotransplant recipients included in the study; a comparison of patients receiving reduced intensity conditioning (RIC,  $n = 17$ ) and myeloablative conditioning (MAC,  $n = 83$ ) treatment.

| Parameter                             | RIC-Group |                | MAC-Group |              | $p$ -Value |
|---------------------------------------|-----------|----------------|-----------|--------------|------------|
|                                       | Median    | Range          | Median    | Range        |            |
| sIL6-R                                | 18,022    | 4775–33,936    | 10,353    | 609–42,666   | <0.01      |
| sgp130                                | 107,106   | 31,493–157,256 | 54,145    | 8286–226,166 | <0.01      |
| IL-31                                 | LLOD      | LLOD–25.5      | 7.0       | LLOD–131     | 0.03       |
| Gender                                | Female    | 5              | Female    | 33           | 0.324      |
|                                       | Male      | 13             | Male      | 49           |            |
| Acute leukemia (number)               | AML       | 9              | AML       | 50           | 0.1        |
|                                       | ALL       | 0              | ALL       | 20           |            |
| Age (years)                           | 61        | 22–70          | 43        | 15–62        | <0.01      |
| Time to neutrophil engraftment (days) | 17        | 6 to 24        | 15        | 10 to 50     | 0.09       |

**Table S3.** Preconditioning serum levels of IL-6 family cytokines, sIL-6R sgp130 for the 100 allotransplanted patients; a comparison of patients with and without later aGVHD (all concentrations are given in pg/mL).

| Parameter                    | No aGVHD    |                     | aGVHD     |                           | $p$ -Value |
|------------------------------|-------------|---------------------|-----------|---------------------------|------------|
|                              | Median      | Range               | Median    | Range                     |            |
| IL-6                         | 13.19       | 1.32–434.93         | 10.35     | LLOD <sup>1</sup> –580.78 | 0.602      |
| sIL-6R                       | 10,520      | 4775–33,936         | 12,783    | 609.4–42,666              | 0.271      |
| sgp130                       | 54,158      | 31,493–170,849      | 55,209    | 8286–226,166              | 0.447      |
| IL-6 difference <sup>2</sup> | 43,502.5    | 25,002.5–145,868.00 | 46,843.35 | -20,976.5–206,959         | 0.418      |
| IL-31                        | 7.28        | LLOD–25.51          | LLOD      | LLOD–130.80               | 0.095      |
| OSM                          | LLOD (6.68) | LLOD–86.14          | LLOD      | LLOD–89.29                | 0.530      |
| CNTF                         | 736         | LLOD–15,464         | 577       | LLOD–10,148               | 0.870      |

<sup>1</sup> LLOD, lower limit of detection; <sup>2</sup> The IL-6 difference was defined as the serum level of sgp130 minus the corresponding level of sIL-6R.

**Table S4.** Correlations between pretransplant levels of cytokines and receptors for IL-6 family cytokines, peripheral blood cell counts, serum levels of biochemical parameters and maximal weigh gain. The *p*-values were calculated using Spearman's rank order correlation. The results are presented as the Spearman's  $\rho$  and significant correlations ( $p < 0.05$ ) are highlighted in bold and underlined.

| Parameter           | IL-6                | sIL-6R | sgp130 | IL-6-diff | IL-31 | OSM                | CNTF  |
|---------------------|---------------------|--------|--------|-----------|-------|--------------------|-------|
| Hb                  | <b><u>-0.40</u></b> | -0.11  | -0.17  | 0.17      | -0.04 | -0.12              | 0.01  |
| Leukocytes          | 0.05                | 0.10   | -0.01  | -0.02     | 0.08  | <b><u>0.27</u></b> | -0.02 |
| Neutrophils         | -0.01               | -0.06  | -0.10  | -0.09     | 0.10  | 0.14               | -0.03 |
| Lymphocytes         | -0.02               | 0.06   | -0.02  | -0.03     | 0.12  | 0.12               | 0.13  |
| Monocytes           | 0.05                | 0.03   | -0.13  | -0.14     | -0.01 | 0.01               | -0.04 |
| Thrombocytes        | -0.25               | -0.141 | -0.18  | -0.16     | -0.17 | -0.05              | -0.15 |
| CRP                 | <b><u>0.68</u></b>  | 0.14   | 0.07   | 0.04      | 0.13  | 0.15               | -0.12 |
| LDH                 | -0.08               | 0.17   | 0.07   | 0.04      | -0.02 | 0.06               | -0.11 |
| Maximal weight gain | 0.137               | -0.03  | 0.05   | 0.05      | -0.02 | 0.07               | -0.04 |

Abbreviations: CRP, C reactive protein (mg/L); Hb, Hemoglobin concentration (g/100 mL); IL-6 diff, IL-6 difference; Lactate dehydrogenase count (U/L).

**Table S5.** Crude and adjusted subdistribution hazard ratios for aGVHD.

| Covariate                                  | Crude           |      |        |      | Adjusted        |      |        |      |
|--------------------------------------------|-----------------|------|--------|------|-----------------|------|--------|------|
|                                            | <i>p</i> -Value | SHR  | 95% CI |      | <i>p</i> -Value | SHR  | 95% CI |      |
| IL-6, continuous variable                  | 0.79            | 1.00 | 0.99   | 1.01 |                 |      |        |      |
| IL-6R continues variable                   | 0.31            | 1.00 | 1.00   | 1.00 |                 |      |        |      |
| sgp130, continuous variable                | 0.51            | 1.00 | 0.99   | 1.00 |                 |      |        |      |
| Diff, continuous variable                  | 0.60            | 1.00 | 0.99   | 1.00 |                 |      |        |      |
| IL-31, continues variable                  | 0.43            | 1.01 | 0.98   | 1.03 |                 |      |        |      |
| OSM                                        | 0.82            | 1.00 | 0.98   | 1.02 |                 |      |        |      |
| CNTF continuous variable                   | 0.37            | 1.00 | 1.00   | 1.00 |                 |      |        |      |
| Age/10 year                                | 0.33            | 1.10 | 0.89   | 1.37 | 0.15            | 1.16 | 0.95   | 1.41 |
| Gender                                     | 0.15            | 1.52 | 0.86   | 2.70 |                 |      |        |      |
| RIC vs. MAC                                | 0.45            | 0.74 | 0.34   | 1.62 |                 |      |        |      |
| Sibling vs. non-sibling                    | 0.01            | 3.12 | 1.39   | 6.99 | <0.01           | 3.76 | 1.87   | 7.54 |
| Female to male vs. other                   | 0.89            | 0.94 | 0.45   | 1.99 |                 |      |        |      |
| CMV pos. donor to neg. recipient vs. other | 0.66            | 0.82 | 0.35   | 1.95 |                 |      |        |      |
| CRP, continuous variable                   | 0.13            | 1.67 | 0.86   | 3.25 |                 |      |        |      |
| CRP, value below vs. above median          | 0.68            | 1.00 | 0.98   | 1.01 |                 |      |        |      |
| Maximum weigh gain, <6.8 kg vs. >6.8 kg    | <0.01           | 1.14 | 1.04   | 1.25 | <0.01           | 1.14 | 1.05   | 1.24 |

**Table S6.** Crude and adjusted subdistribution hazard ratios for treatment related mortality at 100 days post-transplant.

| Covariate                                        | Crude           |      |        |       | Adjusted        |      |        |       |
|--------------------------------------------------|-----------------|------|--------|-------|-----------------|------|--------|-------|
|                                                  | <i>p</i> -Value | SHR  | 95% CI |       | <i>p</i> -Value | SHR  | 95% CI |       |
| IL-6, continuous variable                        | 0.04            | 1.00 | 1.00   | 1.01  |                 |      |        |       |
| IL-6, all other values vs. value in 4. quartile  | <0.01           | 4.01 | 1.48   | 10.93 | 0.12            | 2.43 | 0.78   | 7.51  |
| IL-6R continues variable                         | 0.49            | 1.00 | 0.99   | 1.01  | 0.08            | 2.98 | 0.85   | 10.33 |
| s-gp130, continuous variable                     | 0.92            | 1.00 | 0.99   | 1.01  | 0.02            | 4.79 | 1.29   | 17.67 |
| Diff, continuous variable                        | 0.78            | 1.00 | 0.99   | 1.01  |                 |      |        |       |
| IL-31, continues variable                        | <0.01           | 1.02 | 1.01   | 1.02  |                 |      |        |       |
| IL-31, all other values vs. value in 4. Quartile | 0.02            | 3.43 | 1.24   | 9.47  | 0.01            | 3.78 | 0.85   | 10.33 |
| OSM                                              | 0.10            | 0.93 | 0.87   | 1.02  |                 |      |        |       |
| CNTF continuous variable                         | 0.28            | 0.99 | 0.98   | 1.01  |                 |      |        |       |
| Age/10 year                                      | 0.70            | 1.06 | 0.79   | 1.42  | 0.83            | 1.03 | 0.73   | 1.47  |
| Gender                                           | 0.84            | 1.11 | 0.44   | 3.08  |                 |      |        |       |
| RIC vs. MAC                                      | 0.25            | 0.30 | 0.04   | 2.28  |                 |      |        |       |
| Sibling vs. non-sibling                          | 0.29            | 2.10 | 0.53   | 8.47  |                 |      |        |       |
| Female to male vs. other                         | 0.18            | 2.06 | 0.71   | 5.99  |                 |      |        |       |
| CMV pos. donor to neg. recipient vs. other       | 0.63            | 1.45 | 0.46   | 4.60  |                 |      |        |       |
| CRP, continuous variable                         | <0.01           | 1.03 | 1.01   | 1.04  |                 |      |        |       |
| CRP, value below vs. above median                | 0.02            | 4.59 | 1.32   | 15.94 | 0.04            | 3.83 | 1.01   | 13.75 |
| Maximum weigh gain, <6.8 kg vs. >6.8 kg          | <0.01           | 5.19 | 1.83   | 14.72 | <0.01           | 6.18 | 2.23   | 17.15 |

**Table S7.** Crude and adjusted subdistribution hazard ratios for treatment related mortality at 700 days post-transplant.

| Covariate                                        | Crude   |      |        |      | Adjusted |      |        |      |
|--------------------------------------------------|---------|------|--------|------|----------|------|--------|------|
|                                                  | p-Value | SHR  | 95% CI |      | p-Value  | SHR  | 95% CI |      |
| IL-6, continuous variable                        | 0.11    | 0.99 | 0.99   | 1.00 |          |      |        |      |
| IL-6, all other values vs. value in 4. quartile  | 0.21    | 1.00 | 0.99   | 1.01 |          |      |        |      |
| IL-6R continues variable                         | 0.87    | 1.00 | 0.99   | 1.00 |          |      |        |      |
| sgp130, continuous variable                      | 0.41    | 1.00 | 0.90   | 1.00 |          |      |        |      |
| Diff, continuous variable                        | 0.35    | 1.00 | 0.99   | 1.00 |          |      |        |      |
| IL-31, continues variable                        | <0.01   | 1.02 | 1.01   | 1.02 |          |      |        |      |
| IL-31, all other values vs. value in 4. Quartile | 0.01    | 2.87 | 1.29   | 6.40 | <0.01    | 3.78 | 1.67   | 8.54 |
| OSM                                              | 0.36    | 0.68 | 0.30   | 1.55 |          |      |        |      |
| CNTF continuous variable                         | 0.11    | 2.80 | 0.99   | 1.01 |          |      |        |      |
| Age/10 year                                      | 0.12    | 1.02 | 0.99   | 1.04 | 0.05     | 1.27 | 0.99   | 1.63 |
| Gender                                           | 0.68    | 0.81 | 0.29   | 2.26 |          |      |        |      |
| RIC vs. MAC                                      | 0.96    | 1.00 | 0.98   | 1.02 |          |      |        |      |
| Sibling vs. non-sibling                          | 0.04    | 2.80 | 1.02   | 7.65 | 0.18     | 2.14 | 0.69   | 6.65 |
| Female to male vs other                          | 0.39    | 1.43 | 0.64   | 3.22 |          |      |        |      |
| CMV pos. donor to neg. recipient vs. other       | 0.97    | 1.02 | 0.37   | 2.83 |          |      |        |      |
| CRP, continuous variable                         | 0.03    | 1.02 | 1.00   | 1.03 |          |      |        |      |
| CRP, value below vs above median                 | 0.03    | 2.36 | 1.07   | 5.16 | 0.04     | 2.14 | 1.09   | 5.07 |
| Maximum weigh gain, <6.8 kg vs. >6.8 kg          | <0.01   | 3.35 | 1.50   | 7.50 | <0.01    | 3.90 | 1.69   | 8.99 |

**Table S8.** Crude and adjusted subdistribution hazard ratios for overall survival at day 700.

| Covariate                                        | Crude   |      |        |      | Adjusted |      |        |      |
|--------------------------------------------------|---------|------|--------|------|----------|------|--------|------|
|                                                  | p-Value | SHR  | 95% CI |      | p-Value  | SHR  | 95% CI |      |
| IL-6, continuous variable                        | 0.52    | 0.99 | 0.99   | 1.00 |          |      |        |      |
| IL-6, all other values vs. value in 4. quartile  | 0.59    | 1.00 | 0.99   | 1.01 |          |      |        |      |
| IL-6R continues variable                         | 0.61    | 1.00 | 0.99   | 1.00 |          |      |        |      |
| sgp130, continuous variable                      | 0.34    | 1.00 | 0.99   | 1.00 |          |      |        |      |
| Diff, continuous variable                        | 0.33    | 1.00 | 0.99   | 1.00 |          |      |        |      |
| IL-31, continues variable                        | 0.04    | 1.02 | 1.01   | 1.03 |          |      |        |      |
| IL-31, all other values vs. value in 4. quartile | 0.04    | 2.03 | 1.02   | 4.06 | <0.01    | 2.76 | 1.35   | 5.64 |
| OSM                                              | 0.24    | 0.67 | 0.35   | 1.29 |          |      |        |      |
| CNTF continuous variable                         | 0.26    | 1.80 | 0.64   | 5.06 |          |      |        |      |
| Age/10 year                                      | 0.02    | 1.03 | 1.00   | 1.05 | <0.01    | 1.41 | 1.09   | 1.84 |
| Gender                                           | 0.58    | 1.24 | 0.58   | 2.71 |          |      |        |      |
| RIC vs. MAC                                      | 0.98    | 0.99 | 0.98   | 1.02 |          |      |        |      |
| Sibling vs. non-sibling                          | 0.02    | 1.32 | 1.03   | 1.69 | 0.34     | 1.81 | 0.52   | 6.20 |
| Female to male vs. other                         | 0.36    | 1.51 | 0.63   | 3.63 |          |      |        |      |
| CMV pos. donor to neg. recipient vs. other       | 0.47    | 0.73 | 0.30   | 1.74 |          |      |        |      |
| CRP, continuous variable                         | 0.18    | 1.01 | 0.99   | 1.02 |          |      |        |      |
| CRP, value below vs above median                 | 0.43    | 1.27 | 0.70   | 2.34 | 0.48     | 1.26 | 0.66   | 2.39 |
| Maximum weigh gain, <6.8 kg vs. >6.8 kg          | 0.01    | 2.28 | 1.89   | 4.89 | 0.01     | 2.30 | 1.17   | 4.53 |

**Table S9.** Crude and adjusted subdistribution hazard ratios for overall survival whole period.

| Covariate                                       | Crude   |      |        | Adjusted |      |        |      |      |
|-------------------------------------------------|---------|------|--------|----------|------|--------|------|------|
|                                                 | p-Value | SHR  | 95% CI | p-Value  | SHR  | 95% CI |      |      |
| IL6, continuous variable                        | 0.20    | 1.00 | 1.00   | 1.01     |      |        |      |      |
| IL-6, all other values vs. value in 4. quartile |         |      |        |          |      |        |      |      |
| il-6R continues variable                        | 0.90    | 1.00 | 1.00   | 1.00     |      |        |      |      |
| sgp130, continuous variable                     | 0.47    | 1.00 | 1.00   | 1.00     |      |        |      |      |
| Diff, continuous variable                       | 0.42    |      |        |          |      |        |      |      |
| IL-31, continues variable                       | <0.01   | 1.02 | 1.01   | 1.02     |      |        |      |      |
| il31, all other values vs. value in 4. quartile | 0.02    | 2.68 | 1.21   | 5.92     | 0.01 | 2.97   | 1.23 | 7.14 |
| OSM                                             | 0.96    | 1.00 | 0.97   | 1.03     |      |        |      |      |
| CNTF continuous variable                        | 0.08    | 0.99 | 1.00   | 1.00     | 0.22 | 1.00   | 1.00 | 1.00 |
| Age/10 year                                     | 0.05    | 1.30 | 1.00   | 1.02     | 0.01 | 1.42   | 1.08 | 1.87 |
| Gender                                          | 0.42    | 0.72 | 0.33   | 1.59     |      |        |      |      |
| RIC vs. MAC                                     | 0.65    | 0.79 | 0.29   | 2.18     |      |        |      |      |
| Sibling vs. non-sibling                         | 0.06    | 2.68 | 0.97   | 7.44     | 0.09 | 2.66   | 0.85 | 8.31 |
| Female to male vs. other                        | 0.30    | 1.50 | 0.69   | 3.25     |      |        |      |      |
| CMV pos. donor to neg. recipient vs. other      | 0.23    | 1.54 | 0.72   | 3.76     |      |        |      |      |
| CRP, continuous variable                        | 0.03    | 1.02 | 1.00   | 1.03     |      |        |      |      |
| CRP, value below vs. above median               | 0.03    | 2.32 | 1.09   | 4.91     | 0.10 | 2.08   | 0.88 | 4.95 |
| Maximum weigh gain, <6.8 kg vs. >6.8 kg         | <0.01   | 2.89 | 1.30   | 6.40     | 0.01 | 3.02   | 1.30 | 7.03 |

**Table S10.** Crude and adjusted subdistribution hazard ratios for TRM whole period.

| Covariate                                        | Crude   |      |        | Adjusted |       |        |      |      |
|--------------------------------------------------|---------|------|--------|----------|-------|--------|------|------|
|                                                  | p-Value | SHR  | 95% CI | p-Value  | SHR   | 95% CI |      |      |
| IL-6, continuous variable                        | 0.72    |      |        |          |       |        |      |      |
| IL-6R continues variable                         | 0.689   |      |        |          |       |        |      |      |
| sgp130, continuous variable                      | 0.392   |      |        |          |       |        |      |      |
| Diff, continuous variable                        | 0.382   |      |        |          |       |        |      |      |
| IL-31, continues variable                        | 0.03    | 1.02 | 1.01   | 1.03     |       |        |      |      |
| IL-31, all other values vs. value in 4. quartile | 0.03    | 2.00 | 1.05   | 3.93     | 0.02  | 2.94   | 1.49 | 5.81 |
| OSM                                              | 0.514   |      |        |          |       |        |      |      |
| CNTF continuous variable                         | 0.972   |      |        |          |       |        |      |      |
| Age/10 year                                      | 0.01    | 1.39 | 1.1    | 1.76     | <0.01 | 3.23   | 1.17 | 1.9  |
| Gender                                           | 0.351   |      |        |          |       |        |      |      |
| RIC vs. MAC                                      | 0.228   |      |        |          |       |        |      |      |
| Sibling vs. non-sibling                          | 0.368   | 1.32 | 1.03   | 1.69     |       |        |      |      |
| Female to male vs. other                         | 0.164   |      |        |          |       |        |      |      |
| CMV pos. donor to neg. recipient vs. other       | 0.948   |      |        |          |       |        |      |      |
| CRP, continuous variable                         | 0.305   |      |        |          |       |        |      |      |
| CRP, value below vs. above median                | 0.778   |      |        |          | 0.895 | 1.04   | 0.57 | 1.89 |
| Maximum weigh gain, <6.8 kg vs. >6.8 kg          | 0.03    | 1.97 | 1.07   | 3.63     | 0.02  | 2.08   | 1.12 | 3.89 |

**Table S11.** The prognostic impact of pretransplant CRP levels in allotransplant recipients; a summary of previous studies investigating the effect of pretransplant CRP on outcomes after allogeneic stem cell transplantation.

| Author        | Year | Patient Number   | Non-Malignant Disease | Related/Unrelated | Stem Cell Source |      | Remission/High Risk | HCT-CI | Effect on |                  |                  |                  |       |
|---------------|------|------------------|-----------------------|-------------------|------------------|------|---------------------|--------|-----------|------------------|------------------|------------------|-------|
|               |      |                  |                       |                   | BM               | PBSC |                     |        | aGVHD     | OS               | TRM              | RRM              | cGVHD |
| Artz [5]      | 2008 | 112 <sup>a</sup> | 5                     | 68/44             | 7                | 105  | NR/52               | Yes    | Yes       | Yes <sup>b</sup> | Yes              | NR               | NR    |
| Pavlu [11]    | 2010 | 271              | No, only CML          | 130/141           | 256              | 15   | NR/113              | Yes    | NR        | Yes              | Yes              | No               | NR    |
| Remberger [6] | 2010 | 504              | ~16%                  | 196/229           | 156              | 312  | NR                  | NR     | No        | Yes              | Yes <sup>d</sup> | Yes <sup>e</sup> | NR    |
| Sakamoto [7]  | 2012 | 211              | 8/211                 | 86/95             | 95               | 86   | NR, 90/121          | NR     | No        | No               | Yes              | No               | Yes   |
| Aki [9]       | 2012 | 106              | No                    | 97/9              | 0                | 106  | 22                  | Yes    | NR        | Yes              | No               | NR               | NR    |
| Sato [8]      | 2013 | 90               | NR                    | 39/51             | 58               | 24   | NR/12%              | NR     | Yes       | Yes              | Yes              | NR               | NR    |
| Jordan [10]   | 2013 | 349              | 11%                   | 170/179           | 227              | 121  | NR/113              | NR     | No        | Yes              | Yes              | No <sup>c</sup>  | NR    |

a: Data only for 81 patients; b: effect of CRP only shown in univariate analysis; c: Increased CRP at day of stem cell infusion showed significant higher relapsed related mortality; d: Only for the RIC cohort; e: Effect only in univariate analysis. Abbreviation: BM, Bone Marrow; G-CSF, Granulocyte colony-stimulating factor; NR, not reported; PBSC, peripheral blood stem cells, RRM Relapse-related mortality.

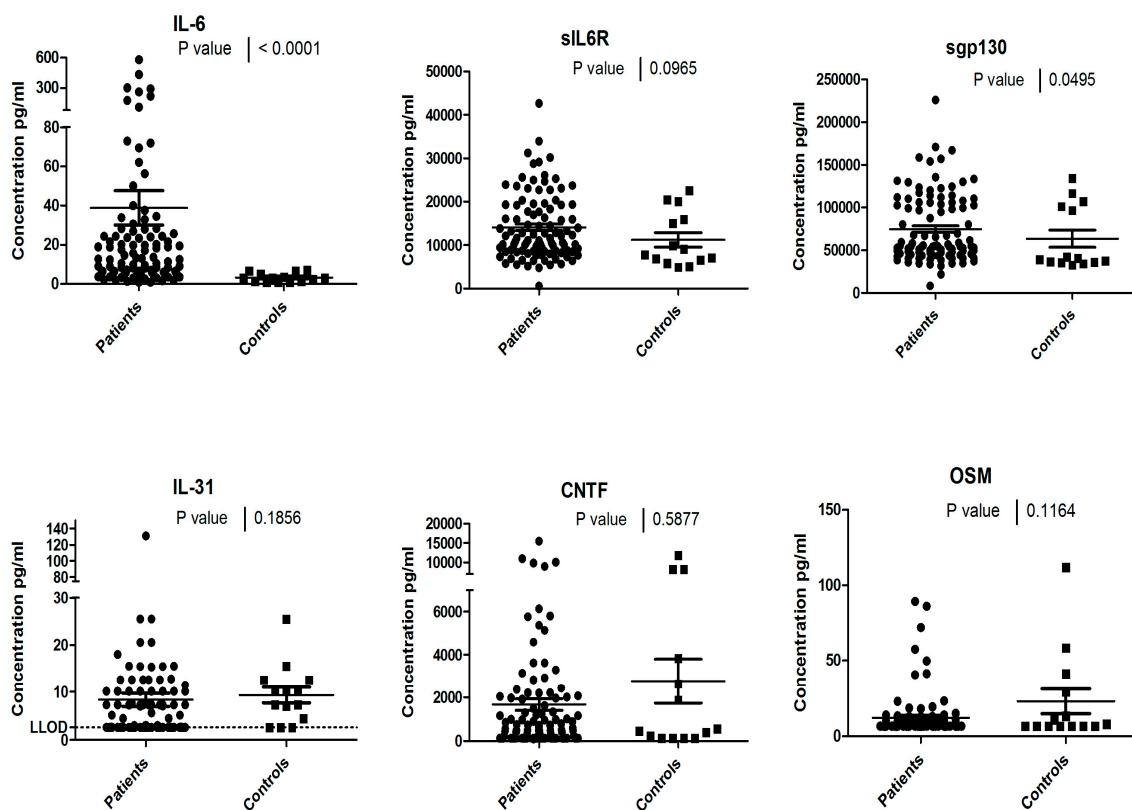

**Figure S1.** Preconditioning serum levels of IL-6 cytokine family members, IL-6R and sgp130; a comparison of between allotransplanted patients ( $n = 100$ ) and healthy controls ( $n = 14$ ) (LLOD = Lower limit of detection).

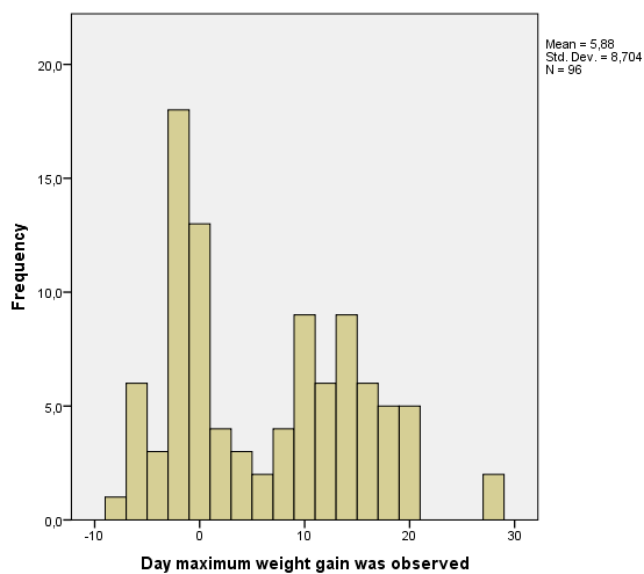

(A)

**Figure S2.** Cont.

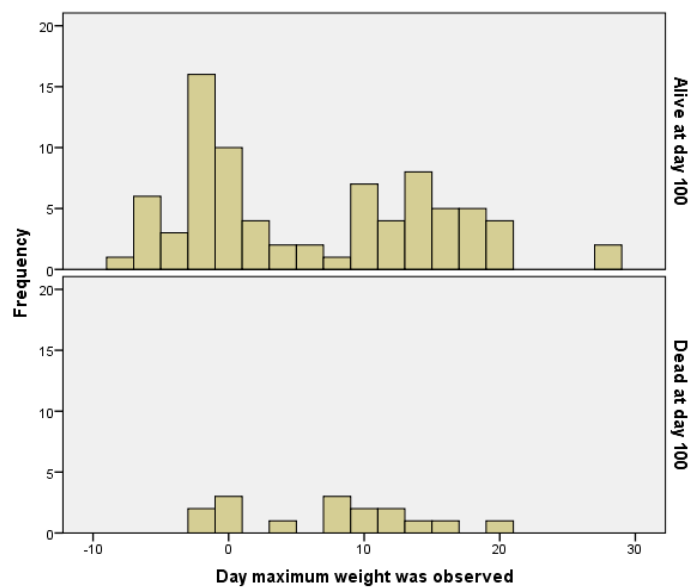

(B)

**Figure S2.** Early posttransplant weight gain in allotransplant recipients. The figures show the day of maximal weight gain after initiation of the conditioning treatment. Day 0 is the day of stem cell infusion. (A) This figure shows the day of maximal weight gain for all allotransplant recipients ( $n = 100$ ); (B) The two figures show the day of maximal weight gain for patients being alive on day +100 posttransplant (**upper**) and for the patients being dead at this time (**lower**).
